# Supplementary material for: Histone H1 Limits DNA Methylation in Neurospora crassa
Source: PubMed Central journal article supplement (PMC4938642; doi:10.1534/g3.116.028324), 2016-05-06
Supplement: supp_g3.116.028324_FigureS1.pdf [file supp_g3.116.028324_FigureS1.pdf]

A

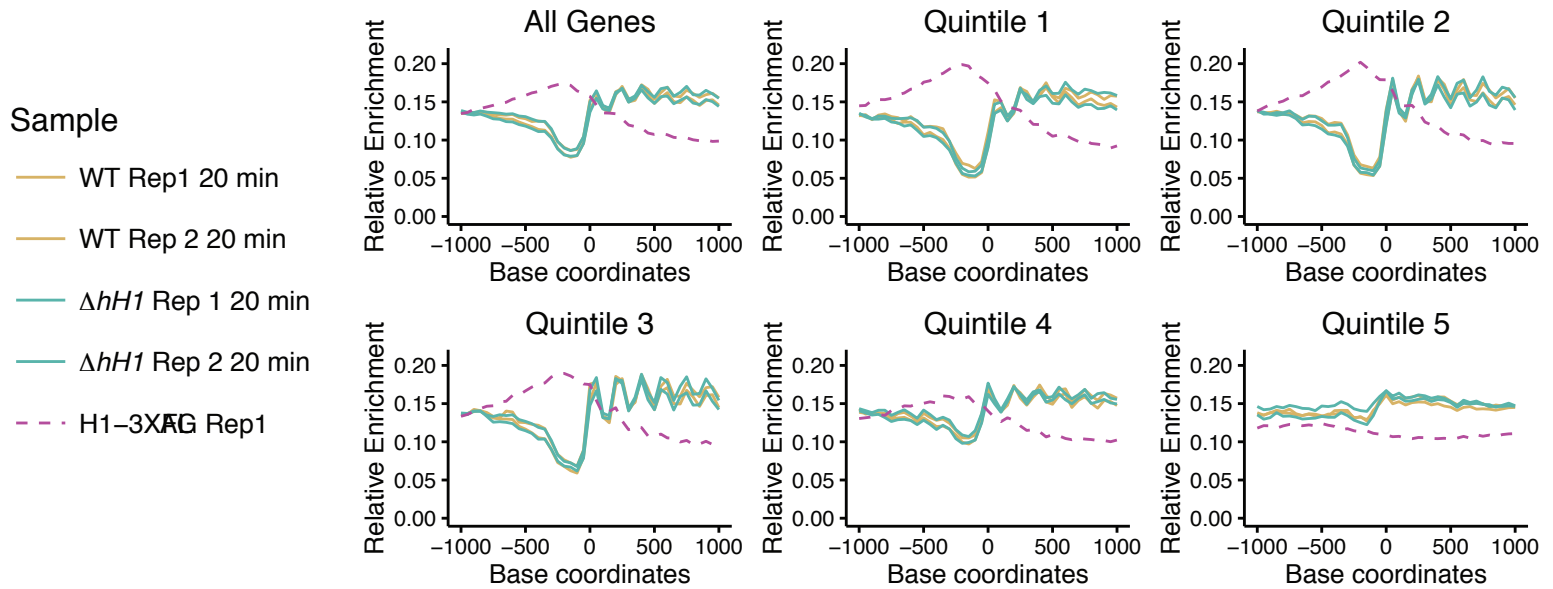

B

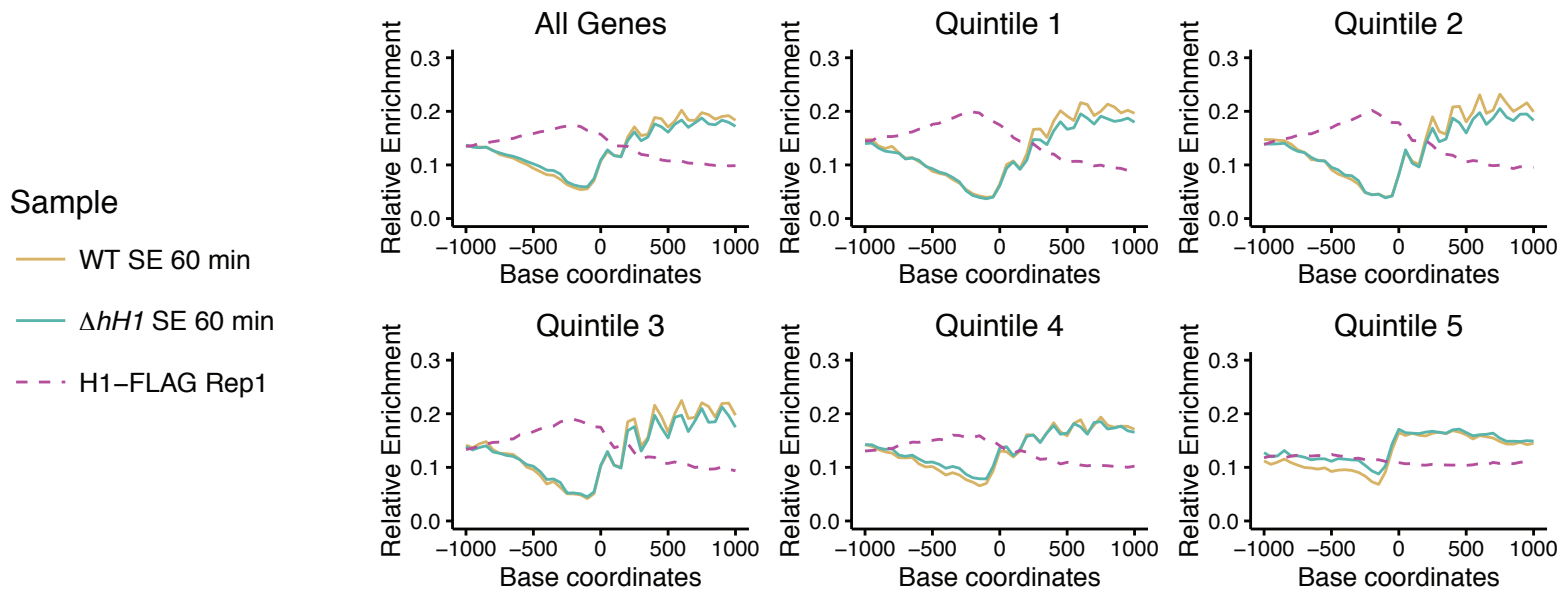

Figure S1 Metaplots depict the average sequencing depth on the + strand across all *N. crassa* genes or for gene expression groups. For expression group analysis, all *N. crassa* genes were ranked by expression level and split into quintile groups, ranging from highest expression (Quintile 1) to lowest expression (Quintile 5). (A) Data from paired-end MNase-seq from a 20 minute MNase digest. Plots show data from two biological replicates each for wildtype and  $\Delta hH1$ . (B) Data from single-end MNase-seq from a 60 minute MNase digest. For all plots, the coverage of + strand reads from an H1-3XFLAG ChIP-seq experiment is shown as a dashed line.
